# Supplementary material for: A bisspiropyran fluorescent probe for the selective and rapid detection of cyanide anion in liqueurs
Source: Royal Society of Chemistry journal article supplement (doi:10.1039/d1nj05773a), 2022-01-01
Supplement: d1nj05773a1.pdf [file d1nj05773a1.pdf]

## Supplementary Information

### **Bisspiropyran fluorescent probe for selective and rapid detection of cyanide anion in liqueurs**

Ziqiang Zhou<sup>#</sup>, Hongzhi Hu<sup>#</sup>, Ling Xia, Gongke Li<sup>\*</sup>, Xiaohua Xiao<sup>\*</sup>

School of Chemistry, Sun Yat-sen University, Guangzhou, 510006, P.R.China

#### **Contents**

Fig. S1 <sup>1</sup>H NMR spectra of 5-chloromethylsalicyl aldehyde

Fig. S2 <sup>1</sup>H NMR spectra of 4-Hydroxy-1,3-benzenedicarboxaldehyde

Fig. S3 <sup>1</sup>H NMR spectra of N, N'-(1,4-butanediyl)bis[2,3,3-trimethyl-3H-indolium]  
dibromide

Fig. S4 <sup>1</sup>H NMR spectra of SP1

Fig. S5 Reproducibility of UV absorption of SP1

Fig. S6 <sup>13</sup>C NMR spectra of SP1

Fig. S7 HR-MS spectra of SP1

Fig. S8 HR-MS spectra of MC1-2CN

Fig. S9 The IR spectra of SP1

Fig. S10 <sup>1</sup>H NMR spectral changes of SP1

Table. S1 Comparison of probe for CN<sup>-</sup>

References

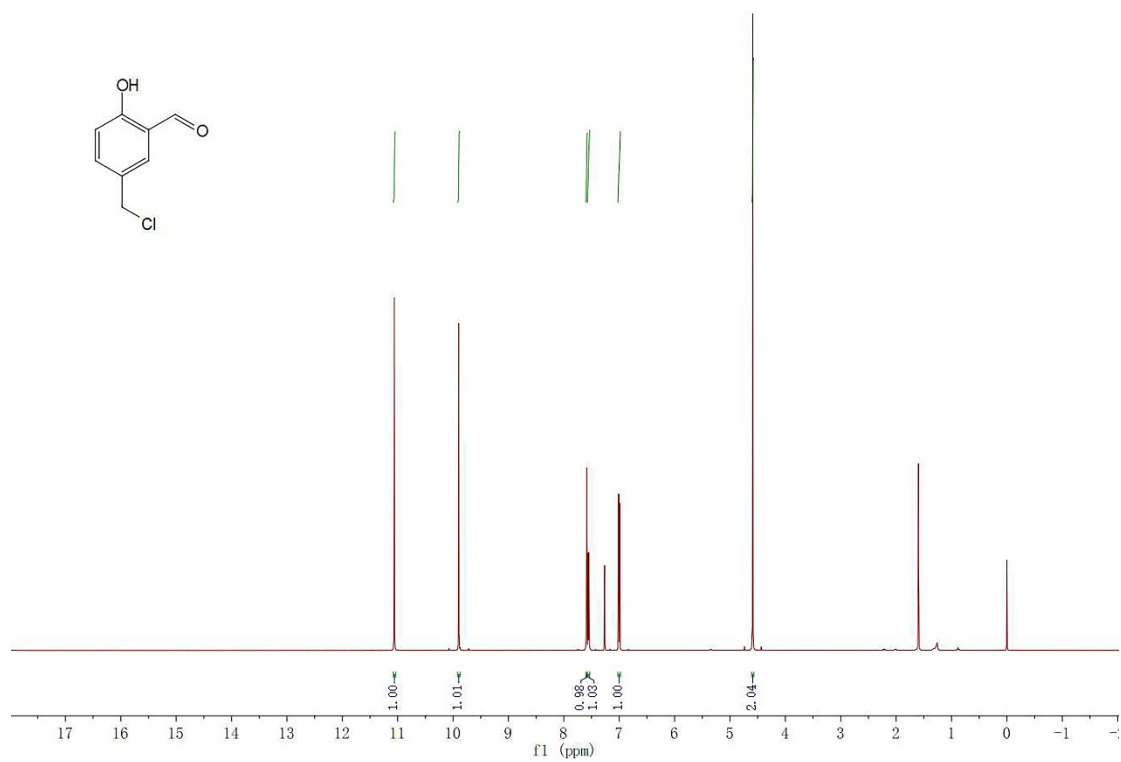

Fig. S1 <sup>1</sup>H NMR (400 MHz, CDCl<sub>3</sub>) spectra of 5-chloromethylsalicylaldehyde

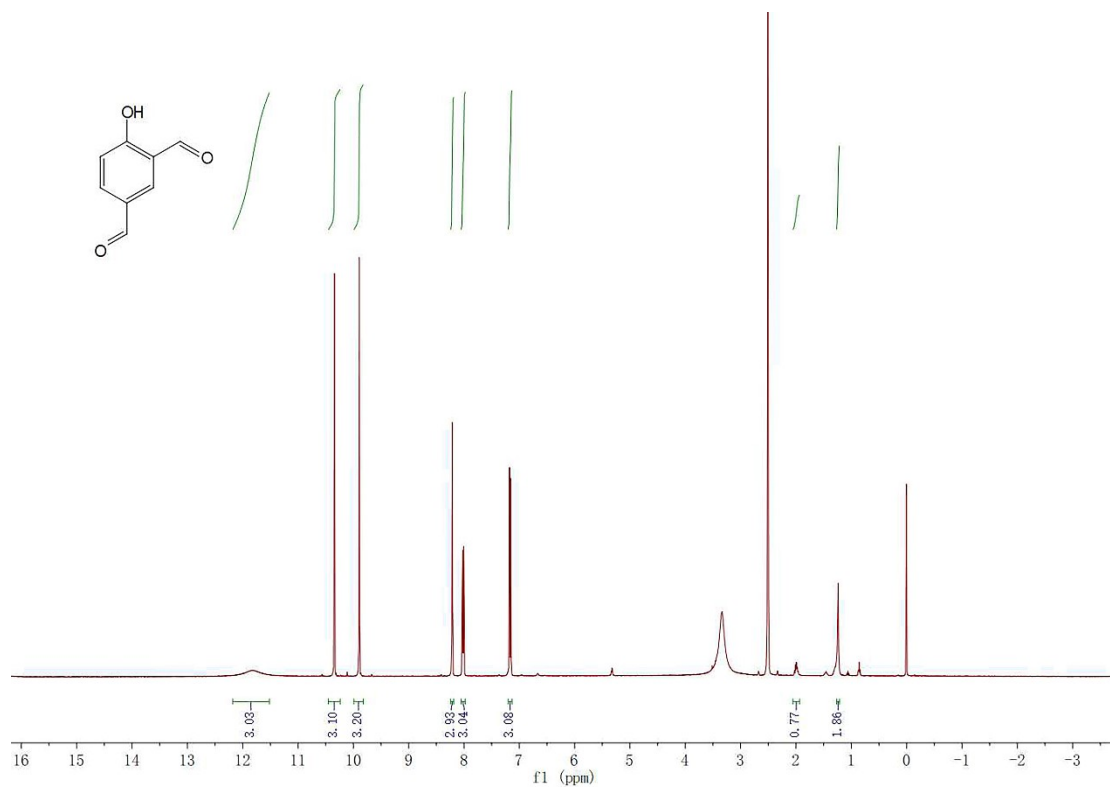

Fig. S2 <sup>1</sup>H NMR (400 MHz, CDCl<sub>3</sub>) spectra of 4-Hydroxy-1,3-benzenedicarboxaldehyde

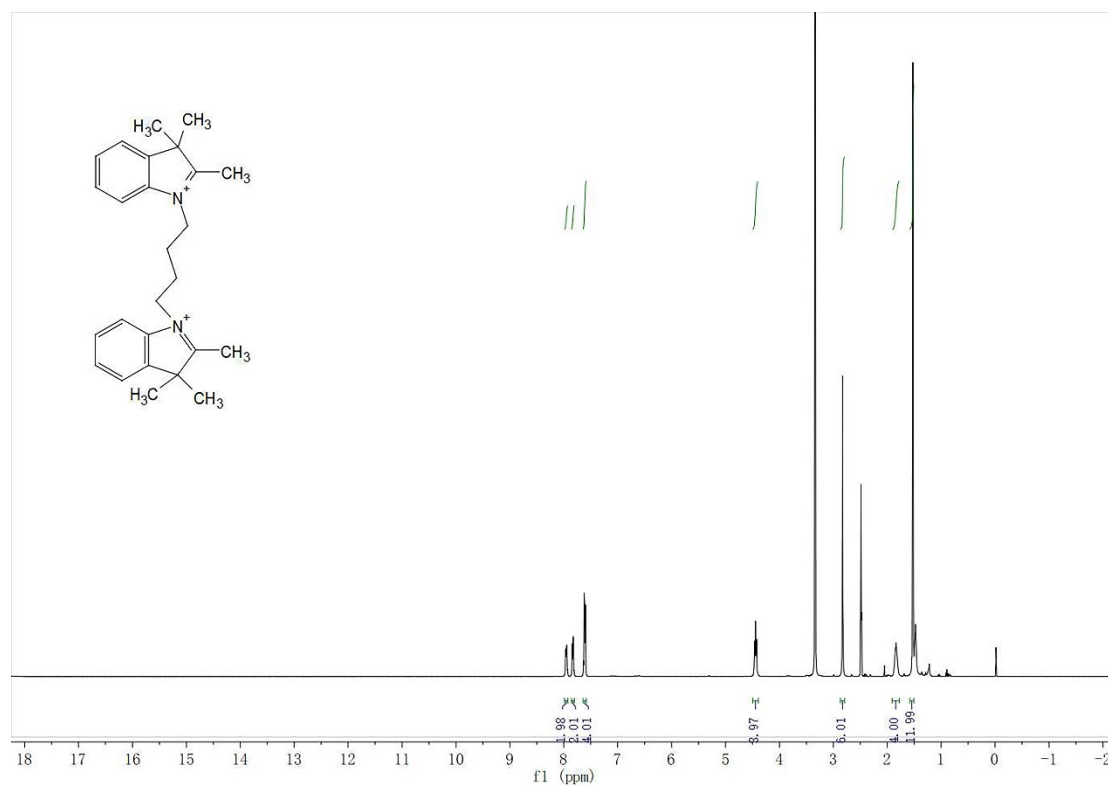

Fig. S3  $^1\text{H}$  NMR (400 MHz,  $\text{CDCl}_3$ ) spectra of N, N'-(1,4-butanediyl)bis[2,3,3-trimethyl-3H-indolium] dibromide

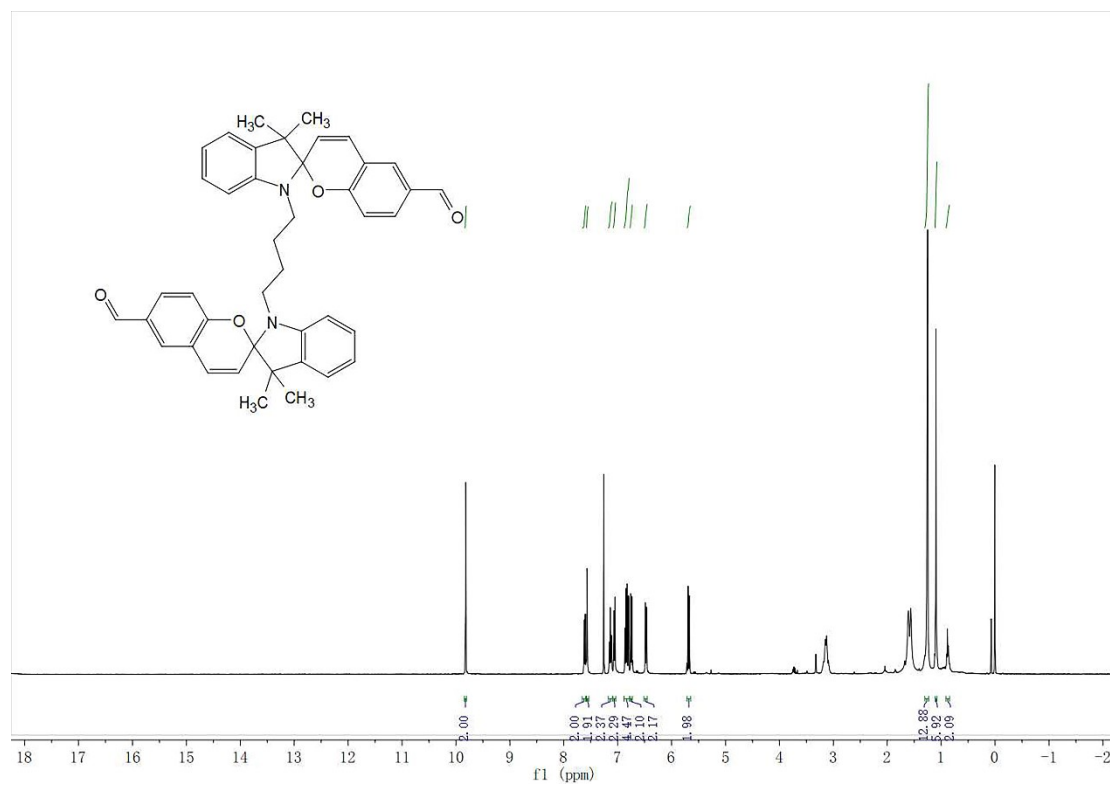

Fig. S4 <sup>1</sup>H NMR (400 MHz, CDCl<sub>3</sub>) spectra of SP1

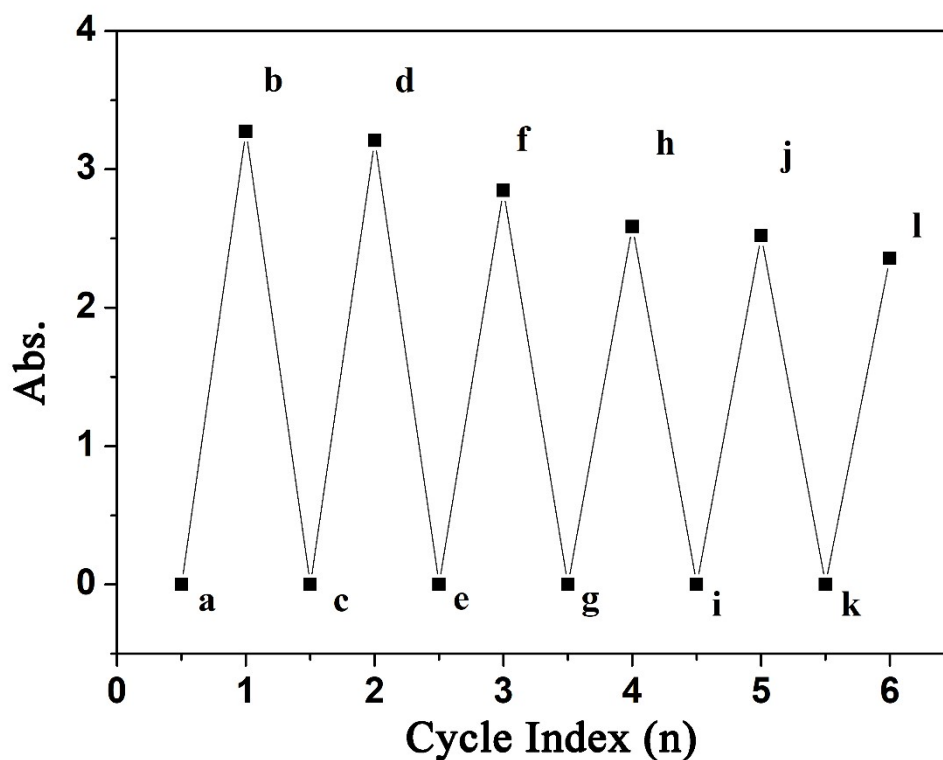

Fig. S5. Absorption intensity of SP1 (50  $\mu\text{mol/L}$ ) solution at 570 nm (excitation at 320 nm) before (a) and after UV (b, d, f, h, j, l) and visible light (c, e, g, i, k) irradiation.

The newly prepared 50.0  $\mu\text{mol/L}$  SP1 solution was excited by 365 nm UV light for 30 min and then placed in the dark for 5 min. This cycle was repeated for 5 times. The absorption intensity of SP1 at 570 nm was measured. After five cycles, the absorption intensity of SP1 at 570 nm was 72% of that of the initial excitation.

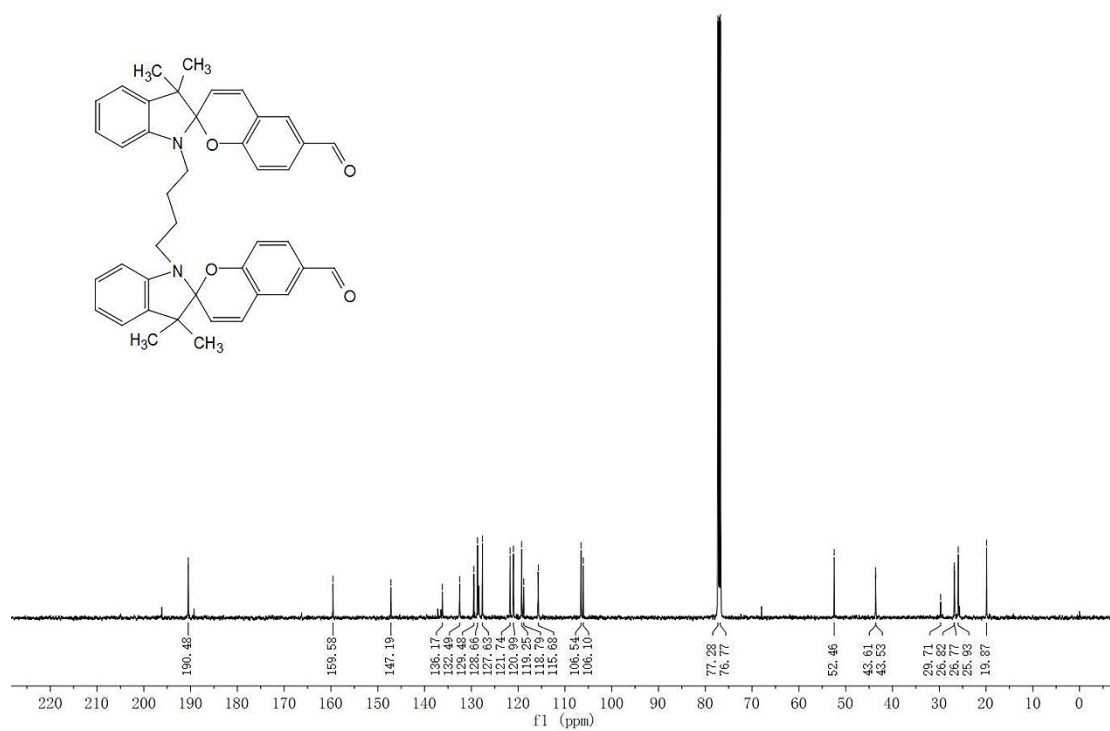

Fig. S6 <sup>13</sup>C NMR (400 MHz, CDCl<sub>3</sub>) spectra of SP1

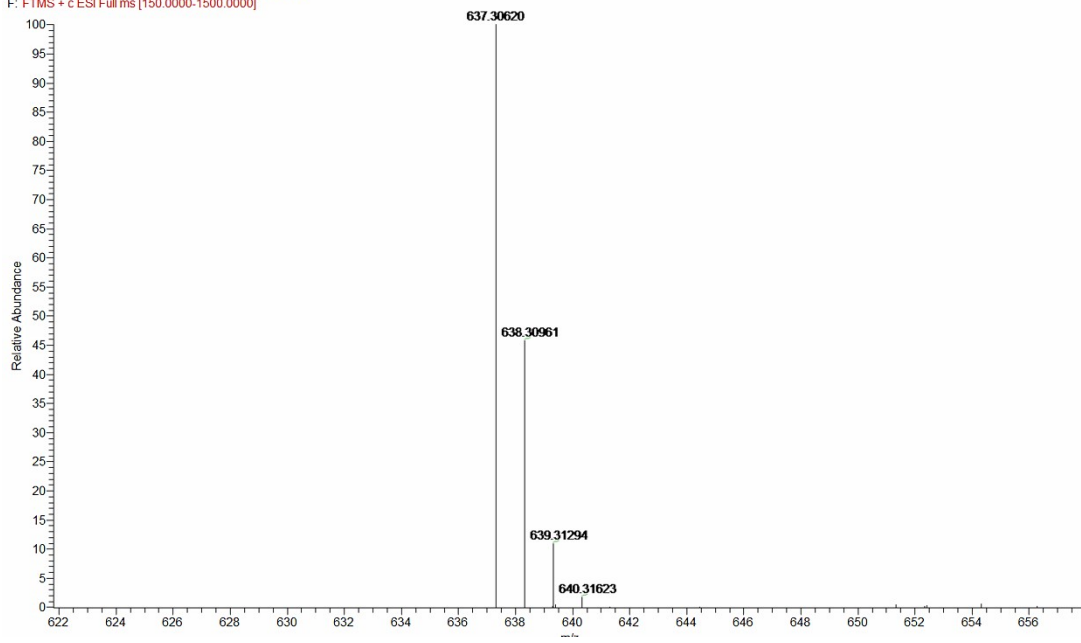

Fig. S7 HR-MS spectra of SP1



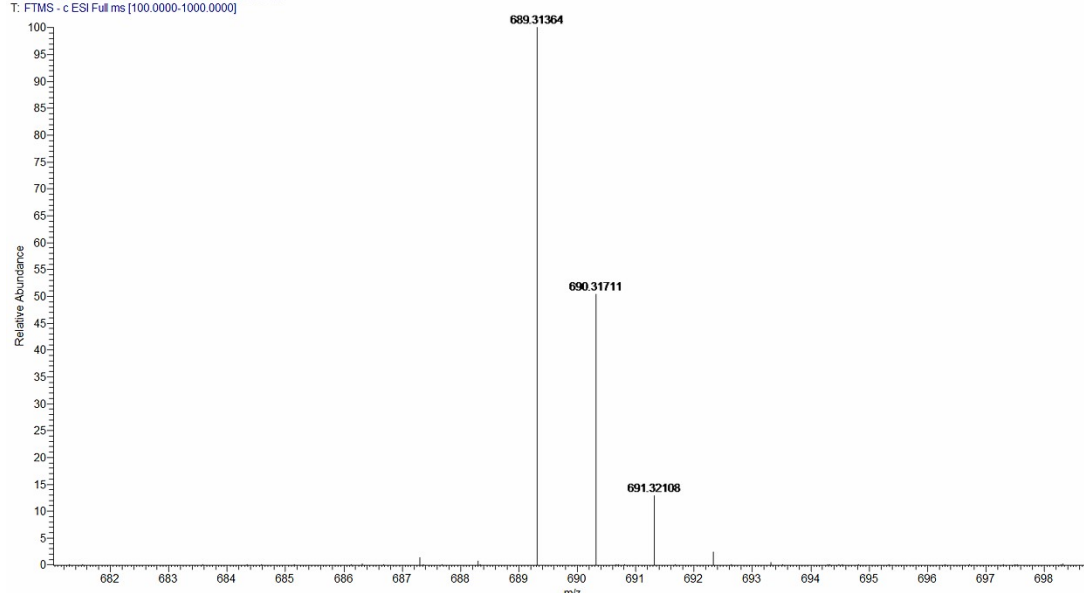

Fig. S8. HR-MS spectra of MC1-2CN

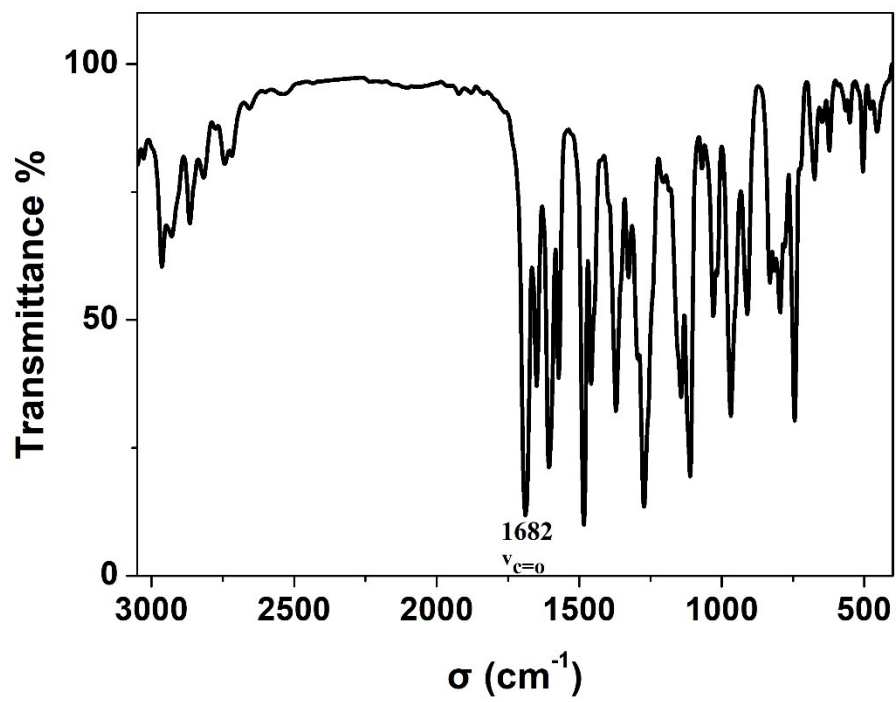

Fig. S9 The IR spectra of SP1

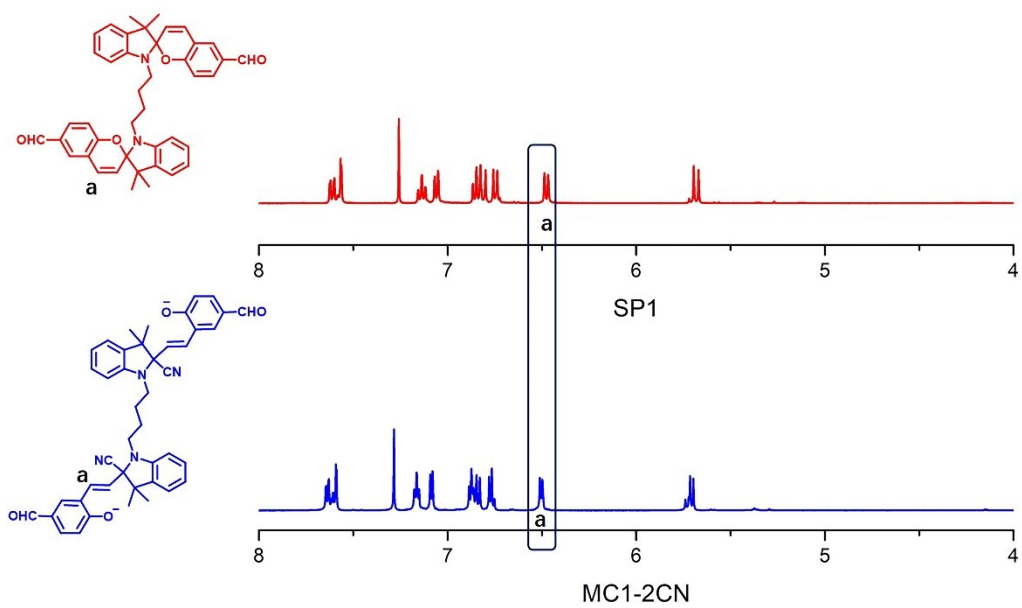

Fig. S10 <sup>1</sup>H NMR spectral changes of SP1

Table. S1 Comparison of probe for CN<sup>-</sup>

| Probe                     | DL<br>( $\mu\text{mol/L}$ ) | Response time<br>(min) | Solvent system( $v/v$ )                  | Ref       |
|---------------------------|-----------------------------|------------------------|------------------------------------------|-----------|
| Salicylideneaniline-based | 2.4                         | 15                     | THF:H <sub>2</sub> O=8:2                 | [1]       |
| Stilbene-based            | 66                          | 15                     | THF:H <sub>2</sub> O=6:4                 | [2]       |
| Triazole-base             | 1.43                        | 15                     | DMSO                                     | [3]       |
| Coumarin-based            | 9.37                        | $\geq 3$               | MeCN:buffer=1:1                          | [4]       |
| Naphthaldehyde-based      | 1.6                         | -                      | EtOH/H <sub>2</sub> O=95:5               | [5]       |
| Benzofurazan-based        | 1.47                        | $\geq 2$               | CH <sub>3</sub> CN/H <sub>2</sub> O=95:5 | [6]       |
| Schiff base               | 0.59                        | $\geq 15$              | DMSO                                     | [7]       |
| Naphthalimide base        | 0.23                        | 60                     | DMSO:H <sub>2</sub> O=9:1                | [8]       |
| spiropyran-based          | 0.21                        | 4                      | THF:H <sub>2</sub> O=9:1                 | This work |

- Not mentioned

## References

- 1 W.C. Lin, S.K. Fang and J.W. Hu, *Anal Chem*, 2014, **86**, 4648-4652.
- 2 Y.D. Lin, Y.S. Peng and W. Su, *Tetrahedron*, 2012, **68**, 2523-2526.
- 3 Y. Chen, W. Shi, Y. Hui and X. Sun, *Talanta*, 2005, **137**, 38-42.
- 4 M.J. Peng, Y. Guo, X.-F. Yang, F. Suzenet and Duan, *RSC Adv.*, 2014, **4**, 19077-19085.
- 5 Y. Jhong and W.H. Hsieh, *J Fluoresc*, 2014, **24**, 1723-1726.
- 6 Z. Liu, X. Wang and Z. Yang, *J. Org. Chem.*, 2011, **76**, 10286-10290.
- 7 C. Liang and S. Jiang, *Analyst*, 2017, **142**, 4825-4833.
- 8 Y. Hao, K.H. Nguyen, Y. Zhang and G. Zhang, *Talanta*, 2018, **176**, 234-241.
